# Supplementary material
Source: PubMed Central journal article supplement (PMC5386818)
Supplement: NIHMS836038-supplement-2.pdf [file NIHMS836038-supplement-2.pdf]

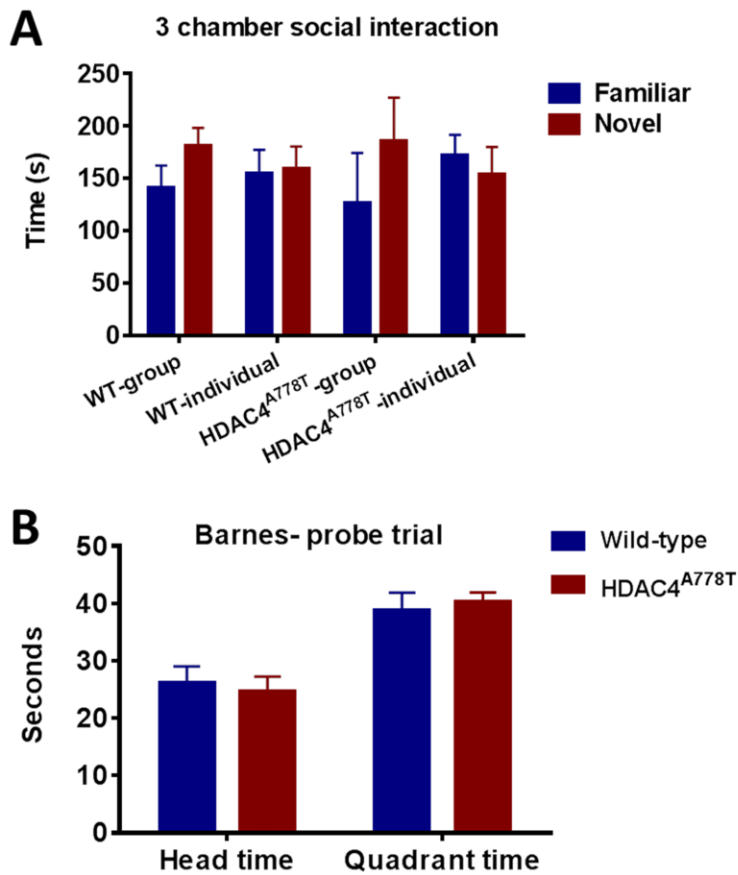

**Supplemental information for Figure 1:** Twelve-16 week old single- and group-housed female mice (n=10-16/group) were tested in the **(A)** 3 chamber social interaction test and group-housed female were tested in the **(B)** Barnes maze as previously described (1). Data presented as mean  $\pm$  S.E.M.

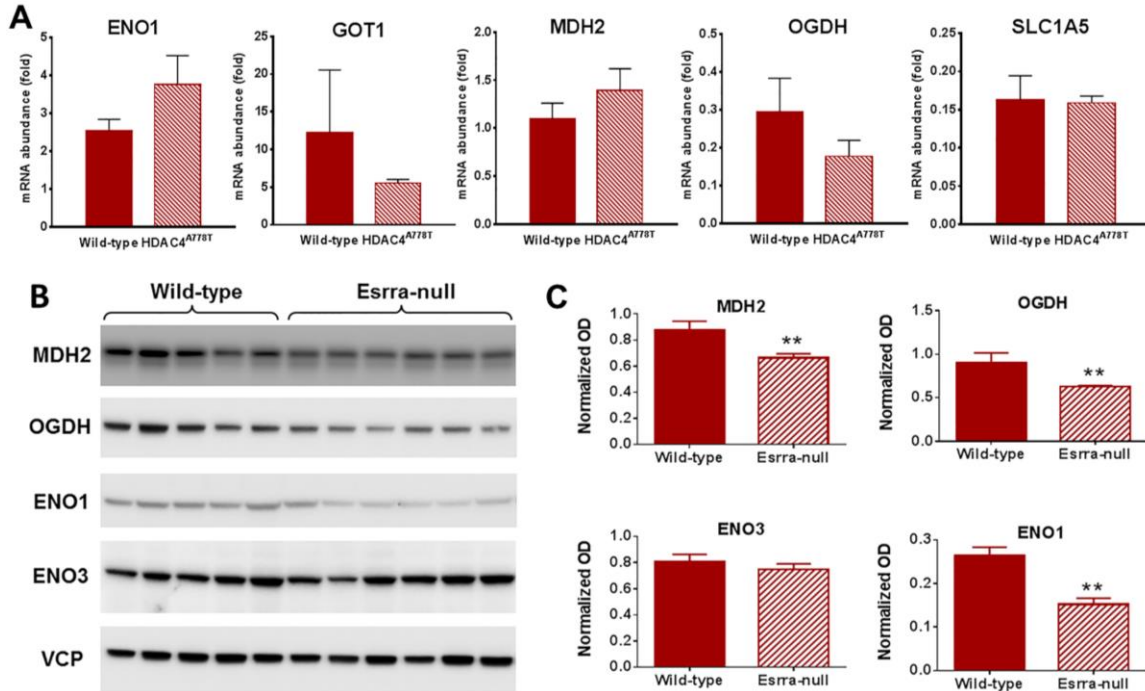

**Supplementary information for Figure 2: A.** Measure of mRNA abundance by qPCR in cortex of female single-housed HDAC4<sup>A778T</sup> mice (n=6/group). **B.** Western blot analysis of protein levels in wild-type and ESRRA-null female mice for anti-MDH2, anti-OGDH, anti-ENO1- and anti-ENO3 normalized to anti-VCP (n=6/group). **C.** Data presented as mean  $\pm$  S.E.M. \*\*p < 0.01 indicates significant differences between the groups by t-test.

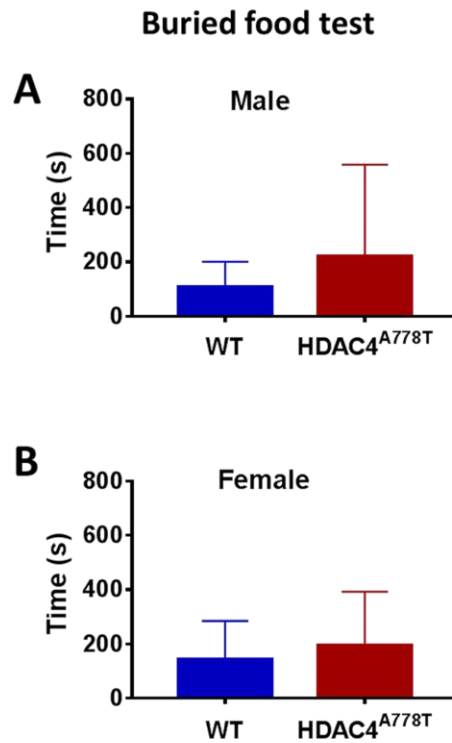

**Supplemental information for Figure 3:** Eight-15 week old, group-housed male **(A)** and female **(B)** mice (n=7-10/group) were tested for buried food test as previously described (2)

**References:**

1. Cui H, Lu Y, Khan MZ, Anderson RM, McDaniel L, Wilson HE, et al. (2015): Behavioral Disturbances in Estrogen-Related Receptor alpha-Null Mice. *Cell Rep.* 11:344-350.
2. Yang M, Crawley JN (2009): Simple behavioral assessment of mouse olfaction. *Curr Protoc Neurosci.* Chapter 8:Unit 8 24.
